# Supplementary material
Source: PubMed Central journal article supplement (PMC10992228)

QuPath open-source morphometric analysis software was used to quantify CXCL9 signal. As shown in the following Figure, compared with paracancerous tissues, the expression level of CXCL9 was significantly increased in cancerous tissues ( $P < 0.05$ ).

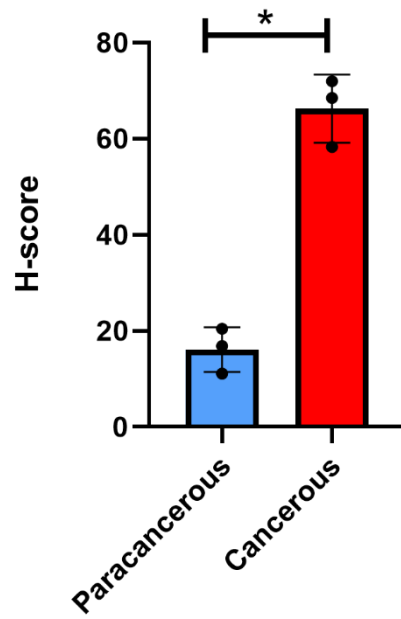

Supplement: 262_2022_3343_MOESM3_ESM.pdf [file 262_2022_3343_MOESM3_ESM.pdf]
