# Supplementary material
Source: PubMed Central journal article supplement (PMC10992228)
Supplement: 262_2022_3343_MOESM4_ESM.pdf [file 262_2022_3343_MOESM4_ESM.pdf]

| id       | logFC    | AveExpr  | t        | P.Value  | adj.P.Val | B        |
|----------|----------|----------|----------|----------|-----------|----------|
| FIGF     | -2.67858 | 4.621303 | -17.151  | 2.92E-49 | 6.06E-46  | 101.2837 |
| OXTR     | -1.95254 | 5.296346 | -16.7987 | 8.89E-48 | 1.17E-44  | 97.89948 |
| ANKRD30A | -1.93524 | 4.901662 | -8.97827 | 1.28E-17 | 1.42E-16  | 29.19582 |
| SCGB1D2  | -1.89084 | 5.478578 | -8.1844  | 4.16E-15 | 3.45E-14  | 23.50702 |
| ABCA8    | -1.87266 | 4.688371 | -13.7499 | 3.29E-35 | 3.27E-33  | 69.23023 |
| ADIPOQ   | -1.8594  | 5.685428 | -10.7554 | 9.78E-24 | 2.30E-22  | 43.09457 |
| AK5      | -1.85926 | 4.622557 | -13.9415 | 5.59E-36 | 6.44E-34  | 70.98648 |
| OGN      | -1.83827 | 5.903381 | -10.3266 | 3.33E-22 | 6.43E-21  | 39.60876 |
| WIF1     | -1.83309 | 4.812411 | -9.52053 | 2.04E-19 | 2.78E-18  | 33.27704 |
| ADH1C    | -1.82222 | 5.265083 | -12.4898 | 3.08E-30 | 1.56E-28  | 57.9004  |
| SCGB2A2  | -1.80572 | 6.268554 | -6.65313 | 1.00E-10 | 4.97E-10  | 13.62186 |
| CD36     | -1.80146 | 6.008898 | -10.6657 | 2.06E-23 | 4.67E-22  | 42.35891 |
| PTN      | -1.794   | 5.537299 | -11.1444 | 3.74E-25 | 1.03E-23  | 46.3211  |
| PIGR     | -1.79232 | 5.739099 | -10.1343 | 1.58E-21 | 2.80E-20  | 38.07105 |
| MAOA     | -1.77612 | 5.238589 | -12.1219 | 8.01E-29 | 3.41E-27  | 54.67468 |
| SDPR     | -1.77529 | 4.603857 | -16.5227 | 1.28E-46 | 1.43E-43  | 95.25538 |
| NTRK2    | -1.74744 | 5.390661 | -15.1088 | 9.76E-41 | 2.72E-38  | 81.83863 |
| ABCA6    | -1.73964 | 5.282475 | -13.9283 | 6.32E-36 | 6.95E-34  | 70.86534 |
| PIP      | -1.73644 | 6.373052 | -5.62344 | 3.63E-08 | 1.33E-07  | 7.889206 |
| TIMP4    | -1.73133 | 4.664749 | -11.0951 | 5.67E-25 | 1.52E-23  | 45.90938 |
| APOD     | -1.71703 | 8.029292 | -10.1754 | 1.14E-21 | 2.05E-20  | 38.39826 |
| LPL      | -1.71408 | 6.029699 | -9.66765 | 6.47E-20 | 9.27E-19  | 34.4098  |
| MAMDC2   | -1.67524 | 4.918451 | -14.3992 | 7.84E-38 | 1.20E-35  | 75.21197 |
| KIT      | -1.67271 | 6.549214 | -10.3197 | 3.53E-22 | 6.79E-21  | 39.55276 |
| ATP1A2   | -1.66888 | 4.046181 | -12.9997 | 3.15E-32 | 2.08E-30  | 62.4358  |
| PDK4     | -1.66748 | 6.205789 | -11.6033 | 7.37E-27 | 2.57E-25  | 50.20204 |
| SCUBE2   | -1.66014 | 5.111118 | -11.1967 | 2.40E-25 | 6.72E-24  | 46.75995 |
| MYH11    | -1.64934 | 6.878803 | -13.4785 | 4.01E-34 | 3.42E-32  | 66.75625 |
| ADAMTS5  | -1.64729 | 5.642482 | -17.683  | 1.66E-51 | 4.81E-48  | 106.4084 |
| CDO1     | -1.64627 | 4.98591  | -13.0406 | 2.17E-32 | 1.47E-30  | 62.80234 |
| CCL28    | -1.64166 | 5.450578 | -11.1268 | 4.34E-25 | 1.18E-23  | 46.17371 |
| GPC3     | -1.61522 | 4.596833 | -13.6572 | 7.75E-35 | 7.40E-33  | 68.38302 |
| TSHZ2    | -1.61103 | 5.825091 | -15.1903 | 4.50E-41 | 1.45E-38  | 82.60521 |
| PI15     | -1.60057 | 5.217625 | -8.8552  | 3.22E-17 | 3.34E-16  | 28.29097 |
| RERGL    | -1.59727 | 3.519023 | -14.8837 | 8.22E-40 | 1.86E-37  | 79.72703 |
| LYVE1    | -1.59471 | 5.743245 | -9.81475 | 2.03E-20 | 3.08E-19  | 35.55293 |
| IGSF10   | -1.59285 | 4.069021 | -15.5906 | 9.93E-43 | 4.12E-40  | 86.383   |
| MATN2    | -1.58741 | 5.203984 | -15.9152 | 4.44E-44 | 2.39E-41  | 89.46152 |
| PIK3C2G  | -1.58366 | 4.163953 | -11.1741 | 2.90E-25 | 8.03E-24  | 46.57051 |
| MME      | -1.57121 | 5.616661 | -14.2588 | 2.92E-37 | 4.19E-35  | 73.91073 |
| CNN1     | -1.55801 | 5.854462 | -13.8174 | 1.77E-35 | 1.86E-33  | 69.8478  |
| NTN4     | -1.55354 | 6.346132 | -12.3168 | 1.43E-29 | 6.73E-28  | 56.3783  |
| SRPX     | -1.53586 | 5.977108 | -13.1346 | 9.26E-33 | 6.49E-31  | 63.64669 |
| TNXB     | -1.53262 | 6.039684 | -16.8062 | 8.27E-48 | 1.17E-44  | 97.9713  |
| TP63     | -1.52869 | 4.940405 | -12.4098 | 6.27E-30 | 3.06E-28  | 57.19551 |
| ITM2A    | -1.52808 | 5.33675  | -12.9282 | 6.01E-32 | 3.78E-30  | 61.79523 |
| THRSP    | -1.52596 | 5.917003 | -8.59087 | 2.25E-16 | 2.15E-15  | 26.37541 |
| ANGPTL1  | -1.49919 | 4.32439  | -12.4841 | 3.24E-30 | 1.64E-28  | 57.85044 |
| RBP4     | -1.4991  | 4.973225 | -10.5559 | 5.10E-23 | 1.10E-21  | 41.46295 |
| MUCL1    | -1.49507 | 7.490525 | -5.10083 | 5.35E-07 | 1.69E-06  | 5.290784 |
| FHL1     | -1.4919  | 5.726467 | -13.6468 | 8.53E-35 | 8.09E-33  | 68.28836 |
| HLF      | -1.48038 | 4.819042 | -18.2512 | 6.50E-54 | 9.43E-50  | 111.8976 |
| IL33     | -1.47993 | 4.800156 | -11.2271 | 1.85E-25 | 5.27E-24  | 47.01463 |
| FMO2     | -1.47957 | 5.630778 | -11.5275 | 1.42E-26 | 4.71E-25  | 49.55544 |
| LIFR     | -1.44512 | 5.369456 | -13.7792 | 2.51E-35 | 2.52E-33  | 69.49765 |
| ABCA9    | -1.4399  | 4.397403 | -14.2813 | 2.36E-37 | 3.53E-35  | 74.11978 |
| MFAP4    | -1.43867 | 6.38822  | -11.6841 | 3.67E-27 | 1.32E-25  | 50.89258 |

|          |          |          |          |          |          |          |
|----------|----------|----------|----------|----------|----------|----------|
| DCLK1    | -1.42498 | 5.131676 | -13.1937 | 5.41E-33 | 3.91E-31 | 64.17941 |
| SVEP1    | -1.42242 | 5.225613 | -12.2883 | 1.84E-29 | 8.49E-28 | 56.12898 |
| ABCA10   | -1.41171 | 3.707304 | -16.4656 | 2.23E-46 | 2.31E-43 | 94.70902 |
| ADH1A    | -1.40826 | 4.807631 | -11.5543 | 1.13E-26 | 3.83E-25 | 49.78376 |
| TGFBR3   | -1.4072  | 5.664872 | -14.9347 | 5.07E-40 | 1.23E-37 | 80.20541 |
| KLHL13   | -1.40671 | 3.961115 | -11.9628 | 3.24E-28 | 1.30E-26 | 53.29296 |
| DNALI1   | -1.4022  | 5.187371 | -11.8092 | 1.24E-27 | 4.72E-26 | 51.96674 |
| SFRP1    | -1.39751 | 7.149416 | -10.5236 | 6.66E-23 | 1.41E-21 | 41.20006 |
| JAM2     | -1.39054 | 5.91771  | -14.9605 | 3.98E-40 | 1.01E-37 | 80.447   |
| TMTC1    | -1.38789 | 5.335136 | -12.8136 | 1.69E-31 | 9.97E-30 | 60.77187 |
| CAV1     | -1.38099 | 6.243739 | -13.443  | 5.55E-34 | 4.68E-32 | 66.43391 |
| LAMA3    | -1.37785 | 5.268055 | -13.9817 | 3.85E-36 | 4.47E-34 | 71.35556 |
| DST      | -1.36764 | 6.625336 | -15.4727 | 3.06E-42 | 1.17E-39 | 85.2675  |
| CFD      | -1.36237 | 6.785036 | -10.6848 | 1.76E-23 | 4.02E-22 | 42.51525 |
| EDNRB    | -1.36148 | 5.183243 | -12.3986 | 6.93E-30 | 3.35E-28 | 57.0972  |
| DPT      | -1.35992 | 6.760263 | -10.431  | 1.42E-22 | 2.88E-21 | 40.44973 |
| LAMA2    | -1.35854 | 5.726182 | -11.8089 | 1.24E-27 | 4.72E-26 | 51.96437 |
| ALDH1A1  | -1.35296 | 5.609163 | -10.3775 | 2.20E-22 | 4.36E-21 | 40.01838 |
| IGF1     | -1.34934 | 5.871363 | -10.1842 | 1.06E-21 | 1.92E-20 | 38.46851 |
| FREM1    | -1.34674 | 3.909747 | -13.2132 | 4.53E-33 | 3.35E-31 | 64.35488 |
| SPRY2    | -1.34247 | 5.214397 | -17.8624 | 2.88E-52 | 2.09E-48 | 108.1399 |
| CHRD1    | -1.33048 | 5.884201 | -9.75436 | 3.27E-20 | 4.82E-19 | 35.0824  |
| GLYAT    | -1.32512 | 3.564772 | -9.80995 | 2.11E-20 | 3.19E-19 | 35.51543 |
| EBF1     | -1.32499 | 5.833765 | -13.1136 | 1.12E-32 | 7.75E-31 | 63.45781 |
| TAT      | -1.31976 | 4.399894 | -7.92895 | 2.48E-14 | 1.90E-13 | 21.75415 |
| RBMS3    | -1.3192  | 5.699583 | -15.22   | 3.39E-41 | 1.12E-38 | 82.88446 |
| NPY2R    | -1.31729 | 4.188324 | -12.0597 | 1.38E-28 | 5.82E-27 | 54.13404 |
| CXCL14   | -1.31378 | 7.114154 | -8.48536 | 4.84E-16 | 4.44E-15 | 25.62178 |
| DCDC2    | -1.30457 | 3.170967 | -10.5609 | 4.90E-23 | 1.06E-21 | 41.50343 |
| ASPA     | -1.29608 | 3.332285 | -13.3475 | 1.33E-33 | 1.07E-31 | 65.56883 |
| CXCL12   | -1.2948  | 6.880676 | -12.1853 | 4.58E-29 | 2.00E-27 | 55.22748 |
| AMIGO2   | -1.28697 | 4.765009 | -12.9175 | 6.62E-32 | 4.11E-30 | 61.6995  |
| DMD      | -1.28642 | 4.955389 | -14.1653 | 6.98E-37 | 9.13E-35 | 73.04708 |
| LHFP     | -1.2818  | 7.440451 | -13.5212 | 2.71E-34 | 2.37E-32 | 67.14483 |
| PLSCR4   | -1.2801  | 5.946989 | -14.4514 | 4.81E-38 | 7.59E-36 | 75.69636 |
| NPY1R    | -1.2769  | 4.764226 | -7.26401 | 2.14E-12 | 1.31E-11 | 17.38172 |
| EGR1     | -1.27495 | 7.904108 | -12.5171 | 2.41E-30 | 1.25E-28 | 58.1414  |
| SCN4B    | -1.27345 | 4.792115 | -17.0866 | 5.46E-49 | 9.91E-46 | 100.6639 |
| MAOB     | -1.26833 | 5.744716 | -10.1129 | 1.88E-21 | 3.26E-20 | 37.90121 |
| CHL1     | -1.26388 | 4.62076  | -13.2524 | 3.17E-33 | 2.38E-31 | 64.70849 |
| HOXA7    | -1.26287 | 5.198047 | -11.3874 | 4.72E-26 | 1.47E-24 | 48.36702 |
| C2orf40  | -1.2611  | 4.713926 | -15.2211 | 3.36E-41 | 1.12E-38 | 82.89459 |
| SYNM     | -1.26052 | 6.72738  | -10.7703 | 8.64E-24 | 2.05E-22 | 43.21711 |
| COL14A1  | -1.25668 | 5.962262 | -9.35935 | 7.10E-19 | 9.04E-18 | 32.04827 |
| PDGFD    | -1.25599 | 5.4264   | -13.7307 | 3.93E-35 | 3.83E-33 | 69.05436 |
| RUNX1T1  | -1.25487 | 5.186749 | -14.2409 | 3.45E-37 | 4.91E-35 | 73.74567 |
| SH3BGRL2 | -1.25448 | 5.318828 | -12.9585 | 4.57E-32 | 2.90E-30 | 62.06637 |
| VIT      | -1.24985 | 4.312361 | -9.86956 | 1.32E-20 | 2.04E-19 | 35.98143 |
| NOSTRIN  | -1.24255 | 4.940001 | -11.5096 | 1.65E-26 | 5.39E-25 | 49.40337 |
| GPD1     | -1.23873 | 5.226625 | -11.2362 | 1.71E-25 | 4.93E-24 | 47.09132 |
| ACACB    | -1.23692 | 5.63462  | -12.9173 | 6.63E-32 | 4.11E-30 | 61.69775 |
| SEMA6D   | -1.23252 | 4.390721 | -13.2896 | 2.26E-33 | 1.73E-31 | 65.04531 |
| SCARA5   | -1.22425 | 5.170806 | -16.2402 | 1.95E-45 | 1.42E-42 | 92.55627 |
| LRP2     | -1.22117 | 4.573209 | -7.68764 | 1.29E-13 | 9.05E-13 | 20.13496 |
| SH3D19   | -1.21554 | 6.074751 | -13.7905 | 2.26E-35 | 2.28E-33 | 69.60104 |
| LIPE     | -1.21541 | 6.113032 | -10.7538 | 9.92E-24 | 2.33E-22 | 43.08091 |
| EFEMP1   | -1.21431 | 7.234447 | -9.9219  | 8.68E-21 | 1.39E-19 | 36.39203 |
| FGF2     | -1.21138 | 5.693336 | -13.9935 | 3.45E-36 | 4.14E-34 | 71.46373 |

|         |          |          |          |          |          |          |
|---------|----------|----------|----------|----------|----------|----------|
| SCGB2A1 | -1.20307 | 5.189932 | -6.11143 | 2.44E-09 | 1.03E-08 | 10.50774 |
| FGF10   | -1.20271 | 4.689057 | -12.6448 | 7.70E-31 | 4.23E-29 | 59.27089 |
| CLEC3B  | -1.19773 | 5.467503 | -12.081  | 1.15E-28 | 4.86E-27 | 54.31901 |
| PLAT    | -1.19545 | 6.263061 | -11.0617 | 7.52E-25 | 1.99E-23 | 45.63013 |
| RAI2    | -1.19291 | 5.563453 | -13.5885 | 1.46E-34 | 1.32E-32 | 67.75706 |
| ITIH5   | -1.19099 | 5.137733 | -14.2599 | 2.89E-37 | 4.19E-35 | 73.92172 |
| PGR     | -1.18708 | 3.660572 | -10.0522 | 3.06E-21 | 5.19E-20 | 37.41985 |
| SAA1    | -1.1868  | 6.346941 | -8.30633 | 1.75E-15 | 1.51E-14 | 24.35747 |
| CAPN6   | -1.18427 | 5.285376 | -7.17192 | 3.88E-12 | 2.29E-11 | 16.79866 |
| EDN3    | -1.17884 | 4.718047 | -10.0408 | 3.36E-21 | 5.64E-20 | 37.3295  |
| CPE     | -1.17363 | 6.3178   | -11.3693 | 5.51E-26 | 1.69E-24 | 48.21362 |
| CTTNBP2 | -1.17351 | 3.399152 | -15.2886 | 1.77E-41 | 6.26E-39 | 83.53014 |
| NEK10   | -1.17306 | 3.569932 | -9.4134  | 4.68E-19 | 6.12E-18 | 32.45884 |
| ACTG2   | -1.16725 | 6.118879 | -7.34304 | 1.28E-12 | 8.02E-12 | 17.88651 |
| NAV3    | -1.16543 | 3.883425 | -13.5434 | 2.21E-34 | 1.94E-32 | 67.34678 |
| FOSB    | -1.16532 | 6.011674 | -12.179  | 4.84E-29 | 2.11E-27 | 55.17274 |
| CITED1  | -1.16516 | 3.870774 | -12.4286 | 5.30E-30 | 2.65E-28 | 57.36127 |
| ANG     | -1.16503 | 5.07982  | -14.2059 | 4.78E-37 | 6.49E-35 | 73.42184 |
| HOXA5   | -1.16322 | 4.763923 | -15.2804 | 1.91E-41 | 6.61E-39 | 83.45336 |
| KCNJ16  | -1.1631  | 3.26947  | -13.9231 | 6.63E-36 | 7.24E-34 | 70.81705 |
| SEMA3C  | -1.1628  | 6.086118 | -10.1298 | 1.64E-21 | 2.90E-20 | 38.03507 |
| RHOJ    | -1.1626  | 5.564245 | -13.7953 | 2.17E-35 | 2.20E-33 | 69.64552 |
| AGR3    | -1.1625  | 2.881566 | -6.77237 | 4.82E-11 | 2.49E-10 | 14.33557 |
| GPRASP1 | -1.16229 | 4.266723 | -15.832  | 9.86E-44 | 4.94E-41 | 88.67132 |
| NOVA1   | -1.15991 | 4.269694 | -14.9522 | 4.30E-40 | 1.08E-37 | 80.36914 |
| CIDEC   | -1.15978 | 5.388045 | -9.4959  | 2.47E-19 | 3.32E-18 | 33.08843 |
| CXCL2   | -1.15166 | 5.460008 | -12.0054 | 2.23E-28 | 9.11E-27 | 53.66273 |
| AASS    | -1.14981 | 4.530582 | -16.3085 | 1.01E-45 | 8.16E-43 | 93.20854 |
| S100B   | -1.14931 | 5.294534 | -9.76551 | 3.00E-20 | 4.43E-19 | 35.16912 |
| EGR3    | -1.14902 | 5.343553 | -11.567  | 1.01E-26 | 3.45E-25 | 49.89237 |
| TESC    | -1.14507 | 4.547208 | -11.7394 | 2.27E-27 | 8.28E-26 | 51.36708 |
| LDB2    | -1.14397 | 4.977705 | -15.7768 | 1.67E-43 | 7.84E-41 | 88.14744 |
| ANGPTL7 | -1.14084 | 3.713605 | -13.0065 | 2.96E-32 | 1.97E-30 | 62.49682 |
| HOXA4   | -1.14079 | 4.163486 | -14.901  | 6.98E-40 | 1.63E-37 | 79.88966 |
| PALMD   | -1.13771 | 6.411206 | -9.97332 | 5.76E-21 | 9.39E-20 | 36.79661 |
| GNG11   | -1.13605 | 5.852749 | -12.5937 | 1.22E-30 | 6.56E-29 | 58.81858 |
| GFRA1   | -1.13582 | 4.592423 | -10.7044 | 1.49E-23 | 3.46E-22 | 42.67555 |
| FAT4    | -1.13204 | 4.834153 | -12.2992 | 1.67E-29 | 7.78E-28 | 56.22445 |
| PCDH18  | -1.12989 | 6.239012 | -9.92628 | 8.38E-21 | 1.34E-19 | 36.42643 |
| SORBS1  | -1.12976 | 5.898341 | -11.5393 | 1.28E-26 | 4.30E-25 | 49.6557  |
| SOCS2   | -1.12317 | 4.680661 | -13.5709 | 1.71E-34 | 1.54E-32 | 67.59711 |
| FOS     | -1.12008 | 6.130574 | -10.1272 | 1.68E-21 | 2.94E-20 | 38.01479 |
| MAB21L1 | -1.11972 | 3.232055 | -15.1751 | 5.20E-41 | 1.61E-38 | 82.46233 |
| CLDN8   | -1.11923 | 4.1486   | -7.40341 | 8.60E-13 | 5.52E-12 | 18.27483 |
| PCK1    | -1.11697 | 3.510237 | -9.75757 | 3.19E-20 | 4.71E-19 | 35.10733 |
| IGJ     | -1.11674 | 7.575234 | -6.28851 | 8.80E-10 | 3.89E-09 | 11.50224 |
| CRIM1   | -1.11651 | 6.406694 | -14.7312 | 3.47E-39 | 6.90E-37 | 78.30131 |
| AOC3    | -1.11491 | 5.885576 | -10.2256 | 7.57E-22 | 1.40E-20 | 38.79879 |
| G0S2    | -1.11328 | 6.642628 | -8.54705 | 3.10E-16 | 2.90E-15 | 26.06163 |
| ERBB4   | -1.10916 | 4.561282 | -8.97769 | 1.29E-17 | 1.42E-16 | 29.1915  |
| STC2    | -1.10778 | 4.747731 | -10.2916 | 4.43E-22 | 8.43E-21 | 39.32766 |
| PDE2A   | -1.10658 | 4.75219  | -15.1449 | 6.93E-41 | 2.05E-38 | 82.17796 |
| CMYA5   | -1.10623 | 4.452364 | -11.7926 | 1.43E-27 | 5.36E-26 | 51.82435 |
| PDE8B   | -1.10581 | 3.736766 | -10.2291 | 7.36E-22 | 1.36E-20 | 38.82716 |
| GHR     | -1.10249 | 4.866078 | -10.808  | 6.31E-24 | 1.52E-22 | 43.52692 |
| NFIA    | -1.10101 | 6.978488 | -11.5129 | 1.61E-26 | 5.28E-25 | 49.43092 |
| MYBPC1  | -1.09897 | 4.555163 | -6.02536 | 3.98E-09 | 1.63E-08 | 10.03275 |
| TFPI    | -1.09836 | 5.004068 | -9.63425 | 8.40E-20 | 1.18E-18 | 34.15174 |

|           |          |          |          |          |          |          |
|-----------|----------|----------|----------|----------|----------|----------|
| PPP1R1A   | -1.09213 | 5.679069 | -8.49269 | 4.59E-16 | 4.22E-15 | 25.67389 |
| IL20RA    | -1.08556 | 4.355578 | -8.58025 | 2.43E-16 | 2.31E-15 | 26.29927 |
| SLC19A3   | -1.08115 | 4.490596 | -8.78651 | 5.35E-17 | 5.43E-16 | 27.78947 |
| PELI2     | -1.07749 | 5.185267 | -14.9664 | 3.76E-40 | 9.85E-38 | 80.50228 |
| MEIS2     | -1.07694 | 4.598547 | -13.0274 | 2.45E-32 | 1.65E-30 | 62.68374 |
| PPARG     | -1.07656 | 4.795216 | -10.2342 | 7.06E-22 | 1.31E-20 | 38.86806 |
| NR2F1     | -1.07578 | 5.362344 | -9.49635 | 2.46E-19 | 3.31E-18 | 33.09189 |
| HPSE2     | -1.07429 | 4.080591 | -12.8697 | 1.02E-31 | 6.19E-30 | 61.27264 |
| FMOD      | -1.07411 | 6.927931 | -9.84068 | 1.65E-20 | 2.53E-19 | 35.7555  |
| TFPI2     | -1.07219 | 3.363018 | -7.31759 | 1.51E-12 | 9.41E-12 | 17.7235  |
| PLA2G16   | -1.07087 | 6.35191  | -10.0724 | 2.60E-21 | 4.44E-20 | 37.57991 |
| GPAM      | -1.07085 | 5.309756 | -8.39598 | 9.22E-16 | 8.22E-15 | 24.98826 |
| PI16      | -1.06987 | 5.572844 | -9.10933 | 4.78E-18 | 5.56E-17 | 30.1683  |
| RSPO3     | -1.06922 | 5.157856 | -9.80269 | 2.23E-20 | 3.36E-19 | 35.45883 |
| SPRY1     | -1.06369 | 6.152331 | -14.1714 | 6.59E-37 | 8.70E-35 | 73.10386 |
| ANKRD29   | -1.06347 | 4.507569 | -13.9337 | 6.01E-36 | 6.66E-34 | 70.91462 |
| CLSTN2    | -1.06198 | 5.268721 | -8.80015 | 4.84E-17 | 4.94E-16 | 27.88882 |
| ADAMTS1   | -1.0608  | 5.997543 | -11.4215 | 3.52E-26 | 1.12E-24 | 48.65517 |
| IRS1      | -1.05861 | 4.947499 | -12.581  | 1.36E-30 | 7.30E-29 | 58.70584 |
| PDZK1     | -1.05344 | 3.072331 | -7.48173 | 5.13E-13 | 3.37E-12 | 18.78222 |
| TF        | -1.05171 | 4.378222 | -10.0148 | 4.13E-21 | 6.85E-20 | 37.12403 |
| AREG      | -1.04787 | 4.943052 | -6.38725 | 4.93E-10 | 2.25E-09 | 12.06675 |
| SEPP1     | -1.04733 | 7.246242 | -8.3933  | 9.40E-16 | 8.36E-15 | 24.9693  |
| CX3CR1    | -1.04511 | 4.982646 | -11.2155 | 2.04E-25 | 5.77E-24 | 46.91734 |
| CYP4X1    | -1.04296 | 5.425551 | -6.77458 | 4.75E-11 | 2.46E-10 | 14.34888 |
| EMCN      | -1.03962 | 5.050502 | -11.3584 | 6.05E-26 | 1.84E-24 | 48.1215  |
| ACVR1C    | -1.03948 | 4.678522 | -9.36917 | 6.58E-19 | 8.44E-18 | 32.12273 |
| TSPAN7    | -1.03826 | 5.046132 | -11.1387 | 3.92E-25 | 1.07E-23 | 46.27404 |
| CES1      | -1.037   | 5.186706 | -7.77615 | 7.07E-14 | 5.13E-13 | 20.72465 |
| HMGCS2    | -1.03597 | 4.564498 | -5.77254 | 1.62E-08 | 6.15E-08 | 8.669997 |
| STEAP4    | -1.03496 | 5.940425 | -6.99598 | 1.19E-11 | 6.63E-11 | 15.70062 |
| ESR1      | -1.03476 | 4.596875 | -11.5085 | 1.67E-26 | 5.44E-25 | 49.39349 |
| FZD4      | -1.03464 | 5.977365 | -10.5406 | 5.79E-23 | 1.24E-21 | 41.33843 |
| CYBRD1    | -1.03076 | 7.625763 | -12.6646 | 6.44E-31 | 3.56E-29 | 59.44715 |
| GSTM2     | -1.02905 | 5.162964 | -10.3895 | 2.00E-22 | 3.99E-21 | 40.11484 |
| NLGN1     | -1.02518 | 2.567149 | -13.644  | 8.75E-35 | 8.25E-33 | 68.26258 |
| THSD4     | -1.02485 | 4.992348 | -9.55766 | 1.53E-19 | 2.10E-18 | 33.56195 |
| ALB       | -1.02402 | 1.858597 | -7.49821 | 4.59E-13 | 3.04E-12 | 18.88952 |
| TMEM132C  | -1.0213  | 4.918294 | -13.003  | 3.06E-32 | 2.03E-30 | 62.46476 |
| MT1M      | -1.02022 | 6.345973 | -9.69307 | 5.30E-20 | 7.64E-19 | 34.60659 |
| KRT15     | -1.01856 | 6.082619 | -6.69659 | 7.68E-11 | 3.87E-10 | 13.88084 |
| C1orf115  | -1.01721 | 5.092585 | -13.319  | 1.72E-33 | 1.35E-31 | 65.31104 |
| PPP1R14A  | -1.01588 | 5.122061 | -13.7444 | 3.47E-35 | 3.42E-33 | 69.17987 |
| ZBTB16    | -1.01035 | 5.601546 | -12.7063 | 4.43E-31 | 2.52E-29 | 59.8174  |
| ANO1      | -1.01033 | 6.55602  | -9.33193 | 8.76E-19 | 1.11E-17 | 31.84053 |
| NDRG2     | -1.00815 | 7.269637 | -11.2469 | 1.56E-25 | 4.54E-24 | 47.18126 |
| CRYAB     | -1.00673 | 7.04938  | -8.12136 | 6.49E-15 | 5.27E-14 | 23.07081 |
| ABCA5     | -1.00515 | 4.80702  | -13.3435 | 1.38E-33 | 1.09E-31 | 65.53261 |
| RELN      | -1.005   | 3.723085 | -10.0943 | 2.18E-21 | 3.75E-20 | 37.75301 |
| FBLN5     | -1.00396 | 6.572902 | -10.385  | 2.07E-22 | 4.12E-21 | 40.07873 |
| SCN7A     | -1.00316 | 2.866845 | -11.8027 | 1.31E-27 | 4.96E-26 | 51.91139 |
| RECK      | -1.00075 | 5.217611 | -11.4994 | 1.80E-26 | 5.86E-25 | 49.31678 |
| TCEAL7    | -1.00043 | 4.279814 | -14.543  | 2.04E-38 | 3.53E-36 | 76.54745 |
| TRIP13    | 1.000513 | 4.250236 | 12.80987 | 1.75E-31 | 1.03E-29 | 60.73872 |
| UBD       | 1.007123 | 5.951124 | 6.778045 | 4.65E-11 | 2.41E-10 | 14.3698  |
| HIST1H3H  | 1.010315 | 4.110527 | 13.80048 | 2.06E-35 | 2.13E-33 | 69.69283 |
| DIAPH3    | 1.015837 | 3.762829 | 11.58544 | 8.60E-27 | 2.97E-25 | 50.04934 |
| HIST1H2BI | 1.026304 | 5.561086 | 12.23178 | 3.04E-29 | 1.36E-27 | 55.63399 |

|                       |          |          |          |          |          |          |
|-----------------------|----------|----------|----------|----------|----------|----------|
| HIST1H2AI             | 1.029459 | 5.82923  | 11.30782 | 9.31E-26 | 2.78E-24 | 47.6944  |
| HMGB3                 | 1.032679 | 5.000199 | 13.14362 | 8.53E-33 | 6.04E-31 | 63.72827 |
| MAD2L1                | 1.04028  | 3.932692 | 12.24119 | 2.80E-29 | 1.26E-27 | 55.71627 |
| HIST1H2BF             | 1.042404 | 5.735806 | 12.72761 | 3.66E-31 | 2.09E-29 | 60.00652 |
| CCNE1                 | 1.045583 | 4.455803 | 11.59264 | 8.09E-27 | 2.79E-25 | 50.11071 |
| MYBL2                 | 1.049123 | 4.898653 | 13.71061 | 4.73E-35 | 4.55E-33 | 68.87089 |
| HIST2H2A <sub>v</sub> | 1.04921  | 6.894685 | 13.2287  | 3.93E-33 | 2.93E-31 | 64.495   |
| KIF15                 | 1.052601 | 3.341701 | 12.20805 | 3.75E-29 | 1.66E-27 | 55.4265  |
| RTKN2                 | 1.0551   | 3.392556 | 11.46431 | 2.44E-26 | 7.82E-25 | 49.01839 |
| RACGAP1               | 1.058672 | 4.93911  | 14.9374  | 4.95E-40 | 1.22E-37 | 80.23022 |
| BCL2A1                | 1.05945  | 4.412846 | 11.60031 | 7.57E-27 | 2.63E-25 | 50.17618 |
| OIP5                  | 1.059885 | 3.427446 | 13.20391 | 4.93E-33 | 3.59E-31 | 64.27138 |
| GSDMC                 | 1.069963 | 3.740406 | 8.791574 | 5.16E-17 | 5.25E-16 | 27.82635 |
| RAD54L                | 1.078004 | 3.654555 | 13.28195 | 2.42E-33 | 1.85E-31 | 64.97583 |
| APOC1                 | 1.079899 | 5.292671 | 10.61028 | 3.26E-23 | 7.21E-22 | 41.90605 |
| SHCBP1                | 1.080695 | 3.599916 | 13.35258 | 1.27E-33 | 1.02E-31 | 65.6146  |
| IL4I1                 | 1.082854 | 5.307318 | 14.18513 | 5.80E-37 | 7.73E-35 | 73.2302  |
| TAP1                  | 1.09112  | 6.382869 | 11.39241 | 4.52E-26 | 1.41E-24 | 48.40903 |
| CDCA5                 | 1.092686 | 4.216282 | 13.82277 | 1.68E-35 | 1.78E-33 | 69.89698 |
| E2F8                  | 1.094398 | 3.742303 | 12.89614 | 8.03E-32 | 4.92E-30 | 61.50867 |
| ICOS                  | 1.103701 | 3.613851 | 9.845552 | 1.59E-20 | 2.45E-19 | 35.79358 |
| BRIP1                 | 1.106641 | 3.609975 | 10.83982 | 4.84E-24 | 1.18E-22 | 43.78964 |
| CXCL13                | 1.11076  | 4.930669 | 5.794225 | 1.44E-08 | 5.50E-08 | 8.784956 |
| SULF1                 | 1.112544 | 6.999508 | 11.08429 | 6.21E-25 | 1.66E-23 | 45.81893 |
| KPNA2                 | 1.115996 | 6.975606 | 14.49233 | 3.28E-38 | 5.53E-36 | 76.07652 |
| TACC3                 | 1.120735 | 4.558272 | 16.45334 | 2.50E-46 | 2.42E-43 | 94.59213 |
| ZWINT                 | 1.121851 | 4.999133 | 15.10926 | 9.71E-41 | 2.72E-38 | 81.84293 |
| HN1                   | 1.122082 | 5.35708  | 14.85357 | 1.09E-39 | 2.44E-37 | 79.44529 |
| TK1                   | 1.122946 | 5.256699 | 14.2728  | 2.56E-37 | 3.75E-35 | 74.04071 |
| GJB2                  | 1.124934 | 4.717212 | 11.17957 | 2.77E-25 | 7.69E-24 | 46.61607 |
| MCM4                  | 1.13295  | 5.350429 | 13.99028 | 3.56E-36 | 4.22E-34 | 71.43449 |
| RAD51                 | 1.134636 | 4.009135 | 14.8052  | 1.73E-39 | 3.63E-37 | 78.99298 |
| KIF4A                 | 1.135861 | 3.855823 | 14.50084 | 3.03E-38 | 5.17E-36 | 76.15557 |
| FPR3                  | 1.1398   | 5.838421 | 10.33302 | 3.17E-22 | 6.13E-21 | 39.66018 |
| FOXO1                 | 1.146001 | 4.563438 | 11.51065 | 1.64E-26 | 5.36E-25 | 49.41218 |
| SLAMF8                | 1.154349 | 5.544557 | 12.36665 | 9.20E-30 | 4.41E-28 | 56.81611 |
| CENPI                 | 1.165841 | 3.663046 | 13.13537 | 9.19E-33 | 6.48E-31 | 63.65401 |
| MMP9                  | 1.166754 | 6.565522 | 10.48305 | 9.28E-23 | 1.93E-21 | 40.87141 |
| TDO2                  | 1.169018 | 3.299672 | 11.34626 | 6.71E-26 | 2.03E-24 | 48.01881 |
| BLM                   | 1.170805 | 3.867456 | 13.41842 | 6.95E-34 | 5.83E-32 | 66.21115 |
| OLR1                  | 1.170819 | 5.018375 | 10.46221 | 1.10E-22 | 2.26E-21 | 40.7026  |
| LYZ                   | 1.178284 | 7.783802 | 8.646    | 1.51E-16 | 1.46E-15 | 26.77176 |
| PRAME                 | 1.179595 | 3.15702  | 8.498979 | 4.39E-16 | 4.05E-15 | 25.71868 |
| CKAP2L                | 1.18399  | 3.439359 | 13.51248 | 2.93E-34 | 2.53E-32 | 67.06522 |
| MND1                  | 1.189359 | 3.249499 | 11.79975 | 1.34E-27 | 5.08E-26 | 51.88572 |
| CCL18                 | 1.193439 | 5.852748 | 8.168805 | 4.65E-15 | 3.83E-14 | 23.39892 |
| TYMS                  | 1.195334 | 5.390541 | 12.12466 | 7.82E-29 | 3.34E-27 | 54.69897 |
| AURKA                 | 1.200825 | 4.597653 | 14.12132 | 1.05E-36 | 1.34E-34 | 72.64133 |
| ECT2                  | 1.208972 | 4.889418 | 12.98825 | 3.49E-32 | 2.26E-30 | 62.3329  |
| PTTG1                 | 1.220627 | 3.883662 | 13.93643 | 5.86E-36 | 6.65E-34 | 70.93958 |
| CDCA8                 | 1.221804 | 4.212713 | 13.46769 | 4.42E-34 | 3.75E-32 | 66.65828 |
| GINS1                 | 1.223209 | 4.249033 | 13.71136 | 4.70E-35 | 4.55E-33 | 68.87777 |
| CENPA                 | 1.230983 | 4.364974 | 14.11739 | 1.09E-36 | 1.38E-34 | 72.60507 |
| LRP8                  | 1.231388 | 4.790966 | 12.43896 | 4.84E-30 | 2.42E-28 | 57.45221 |
| HIST1H2BC             | 1.231659 | 5.279728 | 12.41054 | 6.23E-30 | 3.06E-28 | 57.20197 |
| RGS1                  | 1.234852 | 6.141205 | 10.44111 | 1.31E-22 | 2.66E-21 | 40.53185 |
| CHEK1                 | 1.239737 | 4.007756 | 12.91496 | 6.77E-32 | 4.18E-30 | 61.67686 |
| RAD51AP1              | 1.240034 | 3.797447 | 12.21423 | 3.55E-29 | 1.58E-27 | 55.48051 |

|          |          |          |          |          |          |          |
|----------|----------|----------|----------|----------|----------|----------|
| HJURP    | 1.242383 | 4.197074 | 15.79208 | 1.45E-43 | 7.00E-41 | 88.29224 |
| KIF2C    | 1.242443 | 4.168026 | 14.96527 | 3.80E-40 | 9.85E-38 | 80.49146 |
| PLA2G7   | 1.243102 | 6.024051 | 10.67465 | 1.91E-23 | 4.35E-22 | 42.43207 |
| CCNB1    | 1.243766 | 4.586316 | 14.13151 | 9.56E-37 | 1.24E-34 | 72.73534 |
| ARHGAP1  | 1.246819 | 4.235514 | 14.56664 | 1.63E-38 | 2.96E-36 | 76.76768 |
| IDO1     | 1.248601 | 4.461366 | 9.015427 | 9.71E-18 | 1.09E-16 | 29.47058 |
| MCM10    | 1.263519 | 4.106281 | 13.24515 | 3.38E-33 | 2.53E-31 | 64.64341 |
| PLK1     | 1.263745 | 5.329815 | 14.90721 | 6.58E-40 | 1.57E-37 | 79.94745 |
| SQLE     | 1.264517 | 5.974878 | 13.29471 | 2.15E-33 | 1.67E-31 | 65.09109 |
| CDCA2    | 1.265257 | 3.347342 | 13.014   | 2.77E-32 | 1.85E-30 | 62.56371 |
| RSAD2    | 1.270277 | 5.284383 | 9.415883 | 4.59E-19 | 6.02E-18 | 32.47776 |
| SPC25    | 1.274064 | 2.770575 | 13.17183 | 6.60E-33 | 4.72E-31 | 63.98228 |
| INHBA    | 1.276528 | 5.382821 | 12.7003  | 4.68E-31 | 2.64E-29 | 59.76376 |
| SOX11    | 1.288374 | 4.363101 | 10.97895 | 1.51E-24 | 3.83E-23 | 44.94166 |
| UHRF1    | 1.288828 | 4.899991 | 15.75481 | 2.07E-43 | 9.09E-41 | 87.93859 |
| EXO1     | 1.291225 | 3.65432  | 14.00738 | 3.03E-36 | 3.70E-34 | 71.59173 |
| CENPE    | 1.298849 | 3.693996 | 13.98862 | 3.61E-36 | 4.23E-34 | 71.41924 |
| ATAD2    | 1.307981 | 5.01246  | 13.37091 | 1.07E-33 | 8.80E-32 | 65.78057 |
| LAMP3    | 1.308664 | 5.153225 | 11.24569 | 1.58E-25 | 4.58E-24 | 47.17128 |
| EZH2     | 1.324455 | 4.788381 | 14.99001 | 3.01E-40 | 8.08E-38 | 80.72343 |
| CCNB2    | 1.326778 | 3.960267 | 14.08709 | 1.45E-36 | 1.79E-34 | 72.32569 |
| UBE2C    | 1.328431 | 5.132016 | 14.56153 | 1.71E-38 | 3.07E-36 | 76.72009 |
| IFI30    | 1.343716 | 8.232785 | 14.57114 | 1.56E-38 | 2.87E-36 | 76.80953 |
| FAM83D   | 1.34523  | 4.271916 | 14.82046 | 1.49E-39 | 3.24E-37 | 79.1356  |
| CDC6     | 1.34737  | 3.698198 | 13.56187 | 1.86E-34 | 1.66E-32 | 67.51452 |
| S100P    | 1.352942 | 4.458871 | 10.72828 | 1.23E-23 | 2.86E-22 | 42.87166 |
| BIRC5    | 1.354992 | 4.518958 | 14.23758 | 3.56E-37 | 5.01E-35 | 73.71493 |
| KIAA0101 | 1.356327 | 4.143028 | 14.89691 | 7.26E-40 | 1.67E-37 | 79.85096 |
| CCNE2    | 1.363426 | 3.809776 | 12.11317 | 8.65E-29 | 3.67E-27 | 54.59894 |
| RRM2     | 1.38329  | 4.493684 | 16.12416 | 5.97E-45 | 3.84E-42 | 91.45011 |
| CDKN3    | 1.39431  | 3.752466 | 14.40025 | 7.77E-38 | 1.20E-35 | 75.22151 |
| HORMAD1  | 1.400061 | 3.232609 | 7.551092 | 3.23E-13 | 2.17E-12 | 19.23488 |
| KIF18A   | 1.40266  | 3.362779 | 12.53711 | 2.02E-30 | 1.06E-28 | 58.31803 |
| CTHRC1   | 1.406482 | 5.983672 | 15.13372 | 7.70E-41 | 2.24E-38 | 82.07279 |
| PRC1     | 1.409517 | 5.236139 | 14.8061  | 1.71E-39 | 3.63E-37 | 79.00133 |
| HMMR     | 1.416512 | 3.572384 | 13.11674 | 1.09E-32 | 7.56E-31 | 63.48642 |
| KIF14    | 1.429033 | 3.180195 | 12.25812 | 2.41E-29 | 1.09E-27 | 55.86435 |
| MMP11    | 1.433777 | 5.516713 | 13.58147 | 1.56E-34 | 1.40E-32 | 67.69296 |
| CKS2     | 1.44181  | 5.854755 | 14.64525 | 7.79E-39 | 1.45E-36 | 77.49984 |
| KIF23    | 1.442962 | 4.551556 | 13.79906 | 2.09E-35 | 2.14E-33 | 69.67986 |
| DEPDC1   | 1.47681  | 3.340108 | 13.94073 | 5.63E-36 | 6.44E-34 | 70.97906 |
| KIF20A   | 1.478048 | 4.189876 | 15.34542 | 1.03E-41 | 3.74E-39 | 84.0662  |
| DTL      | 1.481267 | 4.298305 | 14.46457 | 4.25E-38 | 6.86E-36 | 75.81856 |
| CASC5    | 1.493637 | 3.459448 | 15.17797 | 5.06E-41 | 1.60E-38 | 82.48891 |
| MMP12    | 1.494693 | 3.943681 | 9.368937 | 6.59E-19 | 8.44E-18 | 32.12098 |
| MELK     | 1.501758 | 3.89354  | 14.2803  | 2.39E-37 | 3.53E-35 | 74.11008 |
| HIST1H3B | 1.514434 | 4.98766  | 16.11765 | 6.35E-45 | 3.84E-42 | 91.38811 |
| LMNB1    | 1.538021 | 4.616413 | 14.84671 | 1.17E-39 | 2.56E-37 | 79.38117 |
| FN1      | 1.545542 | 7.970443 | 14.54282 | 2.04E-38 | 3.53E-36 | 76.54602 |
| NEK2     | 1.592649 | 3.570788 | 14.65187 | 7.32E-39 | 1.38E-36 | 77.56151 |
| GBP5     | 1.597213 | 5.887383 | 11.54582 | 1.21E-26 | 4.10E-25 | 49.71153 |
| NUSAP1   | 1.608926 | 4.954025 | 17.28063 | 8.30E-50 | 2.01E-46 | 102.5306 |
| SPP1     | 1.611425 | 7.213822 | 11.00912 | 1.17E-24 | 3.03E-23 | 45.19246 |
| NDC80    | 1.615839 | 3.832743 | 13.63416 | 9.58E-35 | 8.91E-33 | 68.17313 |
| PBK      | 1.616661 | 3.163517 | 13.80775 | 1.93E-35 | 2.00E-33 | 69.7594  |
| KIF11    | 1.633185 | 4.032998 | 16.15975 | 4.24E-45 | 2.93E-42 | 91.7893  |
| UBE2T    | 1.634347 | 5.00998  | 14.72152 | 3.80E-39 | 7.45E-37 | 78.21128 |
| CCNA2    | 1.635014 | 5.190262 | 15.50152 | 2.33E-42 | 9.12E-40 | 85.54016 |

|         |          |          |          |          |          |          |
|---------|----------|----------|----------|----------|----------|----------|
| DLGAP5  | 1.651286 | 4.098875 | 15.89498 | 5.39E-44 | 2.80E-41 | 89.26937 |
| MMP13   | 1.662054 | 4.302951 | 9.654122 | 7.19E-20 | 1.02E-18 | 34.30523 |
| TTK     | 1.669781 | 3.481104 | 14.21074 | 4.57E-37 | 6.28E-35 | 73.46679 |
| BUB1    | 1.720497 | 3.974503 | 16.28083 | 1.32E-45 | 1.01E-42 | 92.9442  |
| MKI67   | 1.722244 | 4.484166 | 16.08723 | 8.51E-45 | 4.94E-42 | 91.09836 |
| COL10A1 | 1.740948 | 5.197227 | 13.20773 | 4.76E-33 | 3.49E-31 | 64.30589 |
| NCAPG   | 1.76865  | 4.205192 | 15.74793 | 2.21E-43 | 9.42E-41 | 87.8734  |
| NUF2    | 1.791446 | 3.875544 | 13.88379 | 9.55E-36 | 1.03E-33 | 70.45633 |
| COL11A1 | 1.794632 | 5.115757 | 12.34017 | 1.16E-29 | 5.54E-28 | 56.58359 |
| CXCL11  | 1.862007 | 4.482538 | 11.98591 | 2.64E-28 | 1.08E-26 | 53.49343 |
| CEP55   | 1.89365  | 4.2854   | 16.38978 | 4.62E-46 | 4.19E-43 | 93.98462 |
| CXCL10  | 1.920629 | 6.016696 | 12.67361 | 5.95E-31 | 3.33E-29 | 59.52682 |
| TPX2    | 1.991879 | 5.005801 | 17.68948 | 1.55E-51 | 4.81E-48 | 106.4709 |
| CXCL9   | 2.010091 | 6.855436 | 11.95737 | 3.40E-28 | 1.36E-26 | 53.24619 |
| ASPM    | 2.04795  | 3.759874 | 15.75899 | 1.99E-43 | 9.01E-41 | 87.97825 |
| ADAMDEC | 2.048425 | 4.959424 | 14.75628 | 2.74E-39 | 5.60E-37 | 78.53582 |
| CENPF   | 2.048844 | 4.828285 | 15.16829 | 5.55E-41 | 1.68E-38 | 82.3979  |
| TOP2A   | 2.097076 | 4.912106 | 16.11957 | 6.24E-45 | 3.84E-42 | 91.40639 |
| ANLN    | 2.138024 | 4.508902 | 17.79243 | 5.70E-52 | 2.76E-48 | 107.4645 |
| MMP1    | 2.32612  | 4.254129 | 12.47882 | 3.39E-30 | 1.71E-28 | 57.8035  |
