# Supplementary material
Source: PubMed Central journal article supplement (PMC10992228)
Supplement: 262_2022_3343_MOESM5_ESM.pdf [file 262_2022_3343_MOESM5_ESM.pdf]

AC090627.1  
ARHGAP9  
BTN3A2  
BTN3A3  
C12orf74  
C1QA  
C1QB  
C5orf56  
CCR5  
CD3E  
CD3G  
CD74  
CELF2-AS1  
CORO1A  
CXCL9  
DOCK10  
FCRL3  
FCRL5  
FYB  
GVINP1  
GZMA  
HERC6  
HLA-B  
HLA-DMB  
HLA-F  
HTRA4  
IFI6  
IGHM  
IGLC1  
IGLJ3  
IGLL5  
IGLV1-44  
IKZF3  
IL2RB  
IL2RG  
IRF1  
LINC00487  
LOC101928173  
LOC102723479  
MNDA  
MPEG1  
MS4A1  
NKG7  
P2RX5  
P2RY8  
PARP15  
PLEK  
PRLR  
SLAMF7  
SMAP2  
TRBC1
